# Supplementary material
Source: PubMed Central journal article supplement (PMC6802891)
Supplement: JSLHR-62-1016-s001.pdf [file JSLHR-62-1016-s001.pdf]

**Supplemental Material S1.** Pairwise correlations for the six span tasks and tasks estimating encoding (rapid digit naming), storage (nonword repetition), and retrieval/redintegration (Peabody Picture Vocabulary Test [PPVT]; Dunn & Dunn, 1997).

|                      | Forward digit span | Forward object span | Forward symbol span | Backward digit span | Backward object span | Backward symbol span | Rapid digit naming | Nonword repetition | PPVT       |
|----------------------|--------------------|---------------------|---------------------|---------------------|----------------------|----------------------|--------------------|--------------------|------------|
| Forward digit span   | —                  | <b>.57</b>          | <b>.47</b>          | <b>.58</b>          | <b>.45</b>           | <b>.35</b>           | <b>.30</b>         | .14                | <b>.62</b> |
| Forward object span  | <b>.56</b>         | —                   | <b>.49</b>          | <b>.36</b>          | <b>.49</b>           | <b>.45</b>           | .12                | .18                | <b>.31</b> |
| Forward symbol span  | <b>.41</b>         | <b>.26</b>          | —                   | <b>.62</b>          | <b>.44</b>           | <b>.60</b>           | <b>.31</b>         | -.11               | <b>.39</b> |
| Backward digit span  | <b>.58</b>         | <b>.51</b>          | <b>.40</b>          | —                   | <b>.64</b>           | <b>.38</b>           | <b>.5</b>          | .01                | <b>.62</b> |
| Backward object span | <b>.66</b>         | <b>.44</b>          | <b>.43</b>          | <b>.64</b>          | —                    | <b>.46</b>           | <b>.37</b>         | .05                | <b>.47</b> |
| Backward symbol span | <b>.54</b>         | <b>.43</b>          | <b>.52</b>          | <b>.51</b>          | <b>.59</b>           | —                    | .23                | .03                | .23        |
| Rapid digit naming   | <b>.53</b>         | <b>.37</b>          | <b>.36</b>          | <b>.49</b>          | <b>.55</b>           | <b>.52</b>           | —                  | -.19               | <b>.59</b> |
| Nonword repetition   | <b>.27</b>         | <b>.29</b>          | .26                 | .17                 | .11                  | .14                  | .04                | —                  | .06        |
| PPVT                 | <b>.57</b>         | <b>.52</b>          | <b>.39</b>          | <b>.52</b>          | <b>.54</b>           | <b>.54</b>           | <b>.60</b>         | <b>.46</b>         | —          |

*Note.* Significant correlations ( $p < .05$  uncorrected for multiple comparisons) are in bold. Correlations for pediatric cochlear implant recipients are above diagonal and shaded; correlations for typical-hearing listeners are below the diagonal.

**Reference**

Dunn, L. M., & Dunn, L. M. (1997). *Peabody Picture Vocabulary Test—Third Edition*. Circle Pines, MN: AGS.
