# Supplementary material
Source: PubMed Central journal article supplement (PMC6802891)
Supplement: JSLHR-62-1016-s002.pdf [file JSLHR-62-1016-s002.pdf]

**Supplemental Material S2.** Linear mixed models with hearing status in place of nonword repetition for forward span.

| Span      | Random intercept | Predictors                             | <i>t</i>    | <i>p</i>        |
|-----------|------------------|----------------------------------------|-------------|-----------------|
| Direction | variance         |                                        |             |                 |
| Forward   | 0.77, SD=0.88    | Age                                    | 0.8         | .42             |
|           |                  | <b>CTONI-2</b>                         | <b>3.1</b>  | <b>&lt; .01</b> |
|           |                  | Stimulus (digits–objects)*             | 1.1         | .25             |
|           |                  | Stimulus (digits–symbols)              | –0.7        | .52             |
|           |                  | Stimulus (objects–symbols)             | –1.8        | .07             |
|           |                  | <b>Rapid digit naming</b>              | <b>3.1</b>  | <b>&lt; .05</b> |
|           |                  | <b>Hearing status</b>                  | <b>3.2</b>  | <b>&lt; .01</b> |
|           |                  | <b>PPVT</b>                            | <b>5.4</b>  | <b>&lt; .01</b> |
|           |                  | <b>PPVT:stimulus (digits–objects)†</b> | <b>–3.6</b> | <b>&lt; .01</b> |
|           |                  | <b>PPVT:stimulus (digits–symbols)</b>  | <b>–4.2</b> | <b>&lt; .01</b> |
|           |                  | PPVT:stimulus (objects–symbols)        | –0.53       | .59             |

*Note.* PPVT = Peabody Picture Vocabulary Test (Dunn & Dunn, 1997); CTONI-2 = Comprehensive Test of Nonverbal Intelligence–Second Edition (Hammill, Pearson, & Wiederholt, 2009). Significant contributors to the model are denoted in bold.

\*A minus sign (–) denotes the effect of changing levels of the variable *stimulus*—for example, the variance due to shifting stimuli from digits to objects.

†A colon (:) denotes an interaction term.

**References**

- Dunn, L. M., & Dunn, L. M. (1997). *Peabody Picture Vocabulary Test–Third Edition*. Circle Pines, MN: AGS.
- Hammill, D. D., Pearson, N. A., & Wiederholt, J. L. (2009). *Comprehensive Test of Nonverbal Intelligence–Second Edition*. Austin, TX: Pro-Ed.
